# Supplementary material for: The characteristics of atmospheric brown carbon in Xi'an, inland China: sources, size distributions and optical properties
Source: Copernicus journal article supplement (doi:10.5194/acp-2019-640), 2019-08-26
Supplement: Supplementary file 1 [file acp-2019-640-supplement.pdf]

1 *Supporting information*

2

3 The characteristics of atmospheric brown carbon in Xi'an,  
4 inland China: sources, size distributions and optical properties

5

6

7

8

9 Can Wu<sup>1,2</sup>, Gehui Wang<sup>1,2,3,4\*</sup>, Jin Li<sup>2</sup>, Jianjun Li<sup>2</sup>, Cong Cao<sup>2</sup>, Shuangshuang Ge<sup>1</sup>, Yuning  
10 Xie<sup>1</sup>, Jianmin Chen<sup>3,5</sup>, Xingru Li<sup>1,6</sup>, Guoyan Xue<sup>1</sup>, Xinpei Wang<sup>1</sup>, Zhuyu Zhao<sup>7</sup>, Fang Cao<sup>7</sup>

11

12

13

14

15

16

17 <sup>1</sup>Key Lab of Geographic Information Science of the Ministry of Education, School of  
18 Geographic Sciences, East China Normal University, Shanghai 210062, China

19 <sup>2</sup>Key Lab of Aerosol Physics and Chemistry, State Key Laboratory of Loess and Quaternary  
20 Geology, Institute of Earth Environment, Chinese Academy of Sciences, Xi'an 710061,  
21 China

22 <sup>3</sup>Institute of Eco-Chongming, 3663 North Zhongshan Road, Shanghai 200062, China

23 <sup>4</sup>CAS Center for Excellence in Regional Atmospheric Environment, Institute of Urban  
24 Environment, Chinese Academy of Sciences, Xiamen 361021, China

25 <sup>5</sup>Department of Environmental Science and Technology, Fudan University, Shanghai 200433,  
26 China

27 <sup>6</sup>Department of Chemistry, Analytical and Testing Center, Capital Normal University, Beijing  
28 100048, China

29 <sup>7</sup>Yale-NUIST Center on Atmospheric Environment, Nanjing University of Information  
30 Science & Technology, Nanjing 210044, China

31

32

33

34

35

36

37 \*Corresponding author. Prof. Gehui Wang

38 E-mail address: [ghwang@geo.ecnu.edu.cn](mailto:ghwang@geo.ecnu.edu.cn), or [wanggh@ieecas.cn](mailto:wanggh@ieecas.cn) (Gehui Wang)

39

40 **Table List**

41 Table S1 Correlation coefficients between  $abs_{\lambda=365nm}$  and organic carbon species during  
42 sampling periods.

43  
44 Table S2 Values of  $Q_{true}$ ,  $Q_{robust}$  and average  $r^2$  for the modeling results during sampling  
45 periods.

46  
47  
48  
49 **Figure caption**

50 Fig. S1 Temporal variations of levoglucosan, PAHs, OPAHs, and nitrophenols during winter  
51 and summer.

52  
53 Fig. S2 Comparison of levoglucosan/mannosan and levoglucosan/galactosan ratios between  
54 biomass fuel and the samples of this study. Hardwoods cited from Fine et al. (2004a,  
55 2004b);Bari et al. (2010), softwood cited from Fine et al. (2004a, 2004b);Bari et al. (2010),  
56 needles derived from Sullivan et al. (2014);Engling et al. (2006), leaves derived from Sullivan  
57 et al. (2014);Schmidl et al. (2008), rice straw cited from Sheesley et al. (2003);Yan et al.  
58 (2015), wheat straw derived from Yan et al. (2015).

59  
60 Fig. S3 A comparison on the results measured by Anderson ( $D_p < 2.1\mu m$ ) and the  $PM_{2.5}$  filter  
61 samples.

62  
63 Fig. S4 Temporal variations of PAHs/OC and levoglucosan/OC during the haze period of  
64 January 12<sup>th</sup> to 19<sup>th</sup> (corresponding to the cyan shadow in Figure 5) in Xi'an.

65  
66 Fig. S5 Regression analysis for PAHs, OPAHs, nitrophenols, EC, and visibility. (a) PAHs,  
67 OPAHs, nitrophenols, and EC vs. visibility, (b) PAHs/EC, OPAHs/EC, and nitrophenols/EC  
68 vs. visibility.

69  
70  
71  
72  
73  
74  
75  
76  
77  
78  
79  
80  
81

82  
83  
84

Table S1 Correlation coefficients between  $\text{abs}_{\lambda=365\text{nm}}$  and organic carbon species during sampling periods.

|              | $\text{abs}_{\lambda=365\text{nm}}\text{-MeOH}$ |        |
|--------------|-------------------------------------------------|--------|
|              | Winter                                          | Summer |
| Levogluconan | 0.97                                            | 0.54   |
| PAHs         | 0.90                                            | 0.53   |
| OPAHs        | 0.94                                            | 0.74   |
| Nitrophenols | 0.80                                            | 0.60   |

85  
86  
87  
88  
89

Note: all data are significant at the 0.01 level

90  
91

Table S2 Values of  $Q_{\text{true}}$ ,  $Q_{\text{robust}}$  and average  $r^2$  for the modeling results during sampling periods.

|                  | $Q_{\text{true}}$ | $Q_{\text{robust}}$ | Average $r^2$ |
|------------------|-------------------|---------------------|---------------|
| Sampling periods | 724               | 718.7               | 0.96          |

92  
93  
94  
95  
96

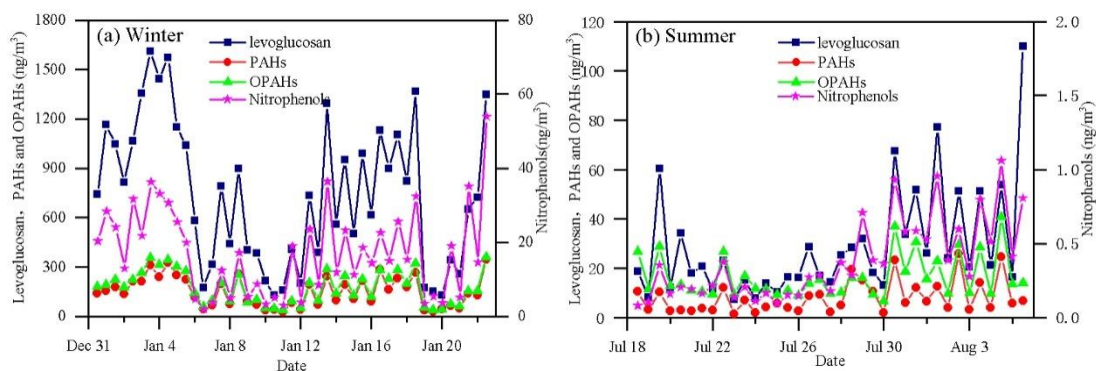

97  
98  
99  
100  
101

Fig. S1 Temporal variations of levoglucosan, PAHs, OPAHs, and nitrophenols during winter and summer.

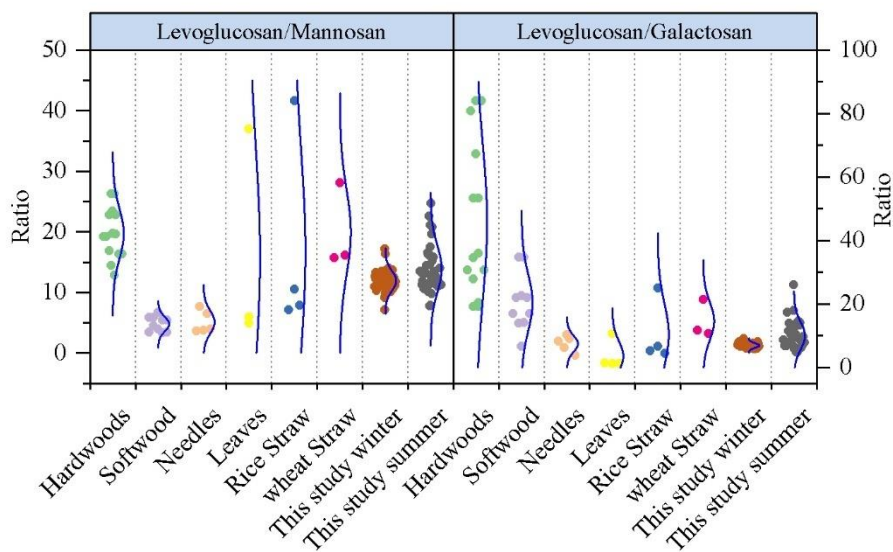

102  
 103 Fig. S2 Comparison of levoglucosan/mannosan and levoglucosan/galactosan ratios between  
 104 biomass fuels and the samples of this study. Hardwoods cited from Fine et al. (2004a,  
 105 2004b);Bari et al. (2010), softwood cited from Fine et al. (2004a, 2004b);Bari et al. (2010),  
 106 needles derived from Sullivan et al. (2014);Engling et al. (2006), leaves derived from Sullivan  
 107 et al. (2014);Schmidl et al. (2008), rice straw cited from Sheesley et al. (2003);Yan et al.  
 108 (2015), wheat straw derived from Yan et al. (2015).

109  
 110

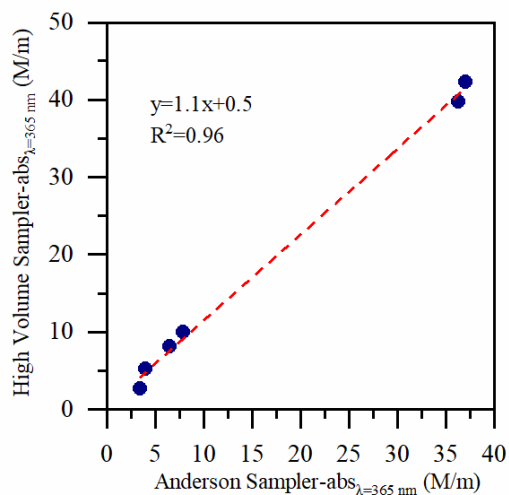

111  
 112 Fig. S3 A comparison on the results measured by Anderson ( $D_p < 2.1 \mu\text{m}$ ) and the  $\text{PM}_{2.5}$  filter  
 113 samples.

114  
 115

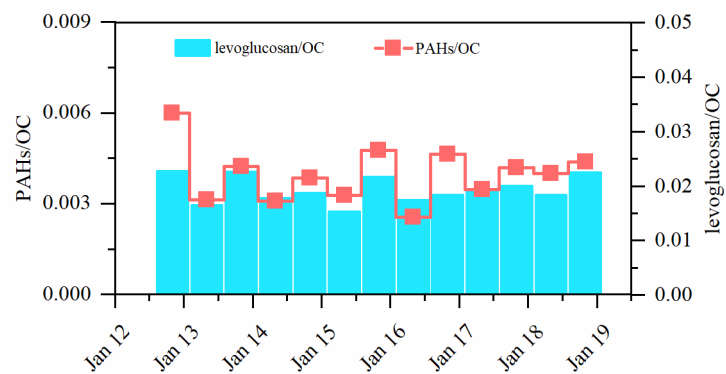

116  
117  
118  
119  
120  
121

Fig. S4 Temporal variations of PAHs/OC and levoglucosan/OC during the haze period of January 12<sup>th</sup> to 19<sup>th</sup> (corresponding to the cyan shadow in Figure 5) in Xi'an.

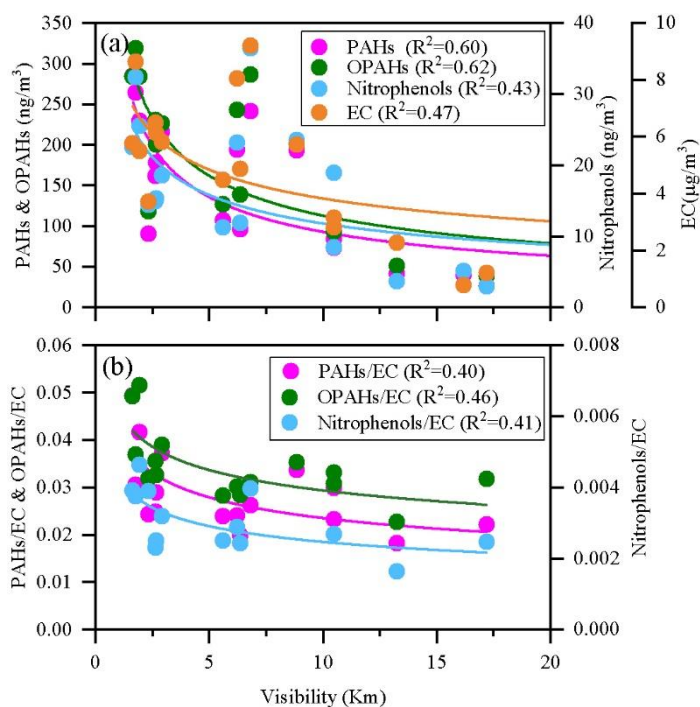

122  
123  
124  
125  
126  
127

Fig. S5 Regression analysis for PAHs, OPAHs, nitrophenols, EC, and visibility. (a) PAHs, OPAHs, nitrophenols, and EC vs. visibility, (b) PAHs/EC, OPAHs/EC, and nitrophenols/EC vs. visibility.

### References

129 Bari, M. A., Baumbach, G., Kuch, B., and Scheffknecht, G.: Temporal variation and impact of wood  
130 smoke pollution on a residential area in southern Germany, Atmospheric Environment, 44,  
131 3823-3832, 2010.

132 Engling, G., Carrico, C., Krelidenweis, S., Collett, J., Day, D. W., Lincoln, E., Hao, W., Iinuma, Y., and

133 Herrmann, H.: Determination of levoglucosan in biomass combustion aerosol by  
134 high-performance anion-exchange chromatography with pulsed amperometric detection,  
135 Atmospheric Environment, 40, 299-311, 2006.

136 Fine, P. M., Cass, G. R., and Simoneit, B. R. T.: Chemical characterization of fine particle emissions  
137 from the fireplace combustion of wood types grown in the Midwestern and Western United States,  
138 Environmental Engineering Science, 36, 387-409, 2004a.

139 Fine, P. M., Cass, G. R., and Simoneit, B. R. T.: Chemical characterization of fine particle emissions  
140 from the wood stove combustion of prevalent United States tree species, Environmental  
141 Engineering Science, 21, 705-721, 2004b.

142 Schmidl, C., Bauer, H., Dattler, A., Hitzenberger, R., Weissenboeck, G., Marr, I. L., and Puxbaum, H.:  
143 Chemical characterisation of particle emissions from burning leaves, Atmospheric Environment,  
144 42, 9070-9079, 2008.

145 Sheesley, R. J., Schauer, J. J., Chowdhury, Z., Cass, G. R., and Simoneit, B. R. T.: Characterization of  
146 organic aerosols emitted from the combustion of biomass indigenous to South Asia, Journal of  
147 Geophysical Research: Atmospheres, 108, n/a-n/a, 10.1029/2002jd002981, 2003.

148 Sullivan, A. P., May, A. A., Lee, T., McMeeking, G. R., Kreidenweis, S. M., Akagi, S. K., Yokelson, R.  
149 J., Urbanski, S. P., and Collett Jr, J. L.: Airborne characterization of smoke marker ratios from  
150 prescribed burning, Atmospheric Chemistry and Physics, 14, 10535-10545,  
151 10.5194/acp-14-10535-2014, 2014.

152 Yan, C., Zheng, M., Sullivan, A. P., Bosch, C., Desyaterik, Y., Andersson, A., Li, X., Guo, X., Zhou, T.,  
153 and Örjan, G.: Chemical characteristics and light-absorbing property of water-soluble organic  
154 carbon in Beijing: Biomass burning contributions, Atmospheric Environment, 121, 4-12, 2015.

155
